# Supplementary material
Source: Elsevier journal article supplement (https://www.sciencedirect.com/science/article/pii/S1885585717302281)
Supplement: mmc1 [file mmc1.pdf]

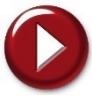

## Material suplementario

# Diagnóstico clínico y genético de la muerte súbita cardiaca de origen no isquémico

### ANEXO 1 MATERIAL SUPLEMENTARIO

Lista de genes incluidos en los paneles *next generation sequencing* (NGS)

ABCC9, ACE, ACE2, ACTA2, ACTC1, ACTN2, ACVRL1, ADAMTSL4, ADD1, ADRA1A, ADRA2A, ADRB1, ADRB2, ADRB3, AGL, AGT, AGTR1, AGTR2, AKAP9, ALMS1, ANK2, ANK3, ANKRD1, APOB, APOE, ASPH, ATP2A2, BAG3, BDKRB2, BMP10, BMPR1B, BMPR2, BRAF, CACNA1B, CACNA1C, CACNA1D, CACNA2D1, CACNB2, CALM1, CALM2, CALR3, CAMK2D, CAPN3, CASQ2, CAV1, CAV3, CBS, CFTR, CHST14, CLIC2, CMA1, CMYA5, CNBP, COG2, COL10A1, COL1A1, COL1A2, COL3A1, COL4A1, COL4A3, COL4A4, COL4A5, COL5A1, COL5A2, CORIN, CRYAB, CSRP3, CTF1, CXADR, CYP11B2, DES, DMD, DMPK, DOLK, DPP6, DSC2, DSG2, DSP, DTNA, ELN, EMD, ENG, ERF, ESR2, EYA1, EYA4, FBN1, FBN2, FHL1, FHL2, FHOD3, FKBP1A, FKBP1B, FKRP, FKTN, FLNA, FLNC, FXN, GAA, GADD45B, GATA4, GHSR, GJA1, GJA5, GLA, GNAQ, GNB3, GPD1L, HCN1, HCN4, HFE, HRAS, IGF1R, IL6, JAG1, JPH2, JUP, KCNA5, KCND3, KCNE1, KCNE1L, KCNE2, KCNE3, KCNE4, KCNH2, KCNJ11, KCNJ12, KCNJ2, KCNJ3, KCNJ5, KCNJ8, KCNK3, KCNQ1, KCNQ2, KLF10, KRAS, LAMA2, LAMA4, LAMP2, LDB3, LDLR, LMNA, LRP6, MAP2K1, MAP2K2, MEF2A, MIB1, MSTN, MURC, MYBPC3, MYH11, MYH6, MYH7, MYL2, MYL3, MYLK, MYLK2, MYOCD, MYOT, MYOZ2, MYPN, NBR1, NEBL, NEXN, NKX2-5, NOS1AP, NOS3, NOTCH1, NPPA, NRAS, OBSL1, PCSK9, PDLIM3, PITX2, PKP2, PKP4, PLEC, PLN, PLOD1, PNN, PPARD, PPARGC1A, PRKAG2, PSEN1, PSEN2, PTPN11, RAF1, RANGRF, RBM20, RBX1, REN, RYR2, SCN1B, SCN2B, SCN3B, SCN4B, SCN5A, SCNN1B, SCNN1G, SFTPC, SGCD, SHOC2, SKI, SLC25A4, SLC2A10, SLC39A13, SMAD1, SMAD3, SMAD4, SMAD9, SNTA1, SOS1, SQSTM1, SRF, SRY, TAZ, TBX20, TBX5, TCAP, TERC, TERT, TGFB1, TGFB2, TGFB3, TGFBR1, TGFBR2, TGFBR3, TKT, TMEM43, TMPO, TNNC1, TNNI3, TNNT2, TNXB, TPM1, TRDN, TRIM55, TRIM63, TRPM4, TTN, TTR, VCL

## Lista de genes incluidos en el estudio Sanger para cada patología

|                                                       |                                                        |
|-------------------------------------------------------|--------------------------------------------------------|
| Síndrome de QT largo                                  | <i>KCNQ1, KCNH2, SCN5A, KCNE1, KCNE1, KCNE2, KCNJ2</i> |
| Síndrome de Brugada                                   | <i>SCN5A</i>                                           |
| Taquicardia ventricular polimórfica catecolaminérgica | <i>RyR2, CASQ2</i>                                     |
| Fibrilación ventricular idiopática                    | <i>KCNQ1, KCNH2, SCN5A, RyR2</i>                       |
| Displasia arritmogénica de ventrículo derecho         | <i>PKP2, DSC2, DSG2, DSP, JUP</i>                      |
| Miocardiopatía hipertrófica                           | <i>MYH7, MYBPC3, TNNT2, TNNI3, TPM1</i>                |
| Miocardiopatía dilatada                               | <i>LMNA, MYH7, MYPBC3</i>                              |

## ANEXO 2 DEL MATERIAL SUPLEMENTARIO

### Material suplementario: aspectos técnicos del estudio genético

Secuenciación por *next generation sequencing* (NGS): las muestras recibidas (sangre, saliva, tejido) se sometieron a un proceso de extracción y purificación automatizada para obtener el ADN genómico (QIAsymphony SP, Qiagen). La preparación de la muestra se llevó a cabo utilizando el *kit* SureSelect Target Enrichment de Agilent para el método de secuenciación multiplexada *paired-end* (Illumina) siguiendo las instrucciones del fabricante. El enriquecimiento se realizó mediante una librería de sondas personalizada (SureSelect, Agilent) para las regiones codificantes y las áreas intrónicas flanqueantes de los genes seleccionados. Las sondas de captura se han diseñado de tal forma que se cubran adecuadamente todas las regiones codificantes y los 30 pares de bases flanqueantes de los intrones y regiones UTR. Tras la generación de *clusters* mediante el dispositivo cBot (Illumina), las librerías de ADN se secuenciaron en la plataforma Illumina HiSeq 1500. Las variantes genéticas consideradas clínicamente relevantes y las regiones de baja cobertura en genes prioritarios se secuenciaron de nuevo en paralelo por el método de Sanger. La sensibilidad y la especificidad analíticas de esta prueba son superiores al 99% para sustituciones puntuales (SNV) y pequeñas inserciones/delecciones (INDEL). Las regiones con niveles de cobertura y/o calidad subóptimos se secuenciaron de nuevo mediante la técnica de Sanger: sustituciones puntuales detectadas con parámetros de calidad subóptimos; sustituciones puntuales que afectan a regiones/genes con alto nivel de homología con otras zonas del genoma (p. ej., pseudogenes), e inserciones y/o delecciones. Todo el proceso se adecuó a los estándares de calidad que engloba la norma UNE-EN ISO 15189.

Secuenciación Sanger: se realizó en ambas direcciones de los fragmentos de interés (exones codificantes con sus regiones intrónicas flanqueantes de los genes de interés incluidos en los paneles, o fragmentos de interés en el caso de confirmaciones o estudios familiares de mutaciones puntuales). La amplificación por PCR se llevó a cabo utilizando *primers* específicos previamente validados. Tras la limpieza, los fragmentos

amplificados se secuenciaron desde ambos extremos. La determinación del genotipo se lleva a cabo utilizando el *software* Variant Reporter (Life Technologies). Todo el proceso se adecuó a los estándares de calidad que engloba la norma UNE-EN ISO 15189.
